# Supplementary material for: Differential accumulation of proteins in oil palms affected by fatal yellowing disease
Source: PubMed Central journal article supplement (PMC5886584; doi:10.1371/journal.pone.0195538), 2018-04-05
Supplement: pone.0195538.s001.pdf [file pone.0195538.s001.pdf]

## Differential accumulation of proteins in oil palms affected by fatal yellowing disease

**S1 Table** Steps and procedures of protein extraction according with SDS/Phenol protocol proposed by Wang (2006) [24]with some modifications.

| Steps | Procedure                                                                                                                                                                                                                                                                                                                                      |
|-------|------------------------------------------------------------------------------------------------------------------------------------------------------------------------------------------------------------------------------------------------------------------------------------------------------------------------------------------------|
| 1     | The roots of five plants were mixed for each condition and the material was macerated in liquid nitrogen. Were using about 300 mg of macerated roots.                                                                                                                                                                                          |
| 2     | In each sample were added 10 mL of buffer containing sucrose (1.5 M), Tris-Hydrochloride (1M, pH 8), sodium dodecyl sulfate (SDS, 10%), (Phenylmethylsulfonyl fluoride (PMSF, 100 mM), polyvinylpyrrolidone (PVPP) and ultrapure water with addition of 100 $\mu$ L of protease inhibitor (SIGMA) and 500 $\mu$ L of $\beta$ -mercaptoethanol. |
| 3     | The samples were sonicated for five repetitions of 30 seconds at room temperature.                                                                                                                                                                                                                                                             |
| 4     | The extracts were divided in ten microtubules each, followed by the addition of 700 $\mu$ L of phenol per microtubule. The samples were vortexed by 15 seconds and centrifuged during 8 minutes at 14000 rpm, for the phenolic phase separation.                                                                                               |
| 5     | The phenolic content was transferred to new microtubule and the operation repeated to eliminate the any residue of aqueous phase or SDS.                                                                                                                                                                                                       |
| 6     | There were added 1300 $\mu$ L of ammonia acetate (100 mM) in methanol (100%) for protein precipitation during 24 hours at -80 $^{\circ}$ C. After this time, a centrifugation at 14000 rpm during 8 minutes, and the supernatant was discarded.                                                                                                |
| 7     | Centrifugation at 14000 rpm during 8 minutes, and the supernatant was discarded. The precipitate was transferred to a new microtubule and washed four times with acetone 80%.                                                                                                                                                                  |
| 8     | The last washing was made with ethanol 70% and the precipitate dried at room temperature in vacuum concentrator around seven minutes.                                                                                                                                                                                                          |
| 9     | The extracts were solubilized in 200 $\mu$ L of urea buffer (7 M) and thiourea (2 M).                                                                                                                                                                                                                                                          |
